# Supplementary material for: Noble gas bonds facilitate anion⋯anion supramolecular assemblies: insights from CSD and DFT analysis
Source: Royal Society of Chemistry journal article supplement (doi:10.1039/d4ce01175a), 2025-01-01
Supplement: d4ce01175a1.pdf [file d4ce01175a1.pdf]

**ESI for manuscript:**

**Noble Gas Bonds Facilitate Anion···Anion Supramolecular Assemblies: Insights  
from CSD and DFT Analysis**

Rosa M. Gomila,<sup>a</sup> and Antonio Frontera\*<sup>a</sup>

*Department of Chemistry, Universitat de les Illes Balears, Crtsa de Valldemossa km  
7.5, 07122 Palma de Mallorca (Balears), SPAIN, E-mail: toni.frontera@uib.es*

**Table of contents**

1. Table S1
2. Cartesian coordinates

## 1. Table S1

Table S1. CSD reference codes of ion pairs involving organoxenon derivatives

|        |        |        |        |            |        |        |        |        |
|--------|--------|--------|--------|------------|--------|--------|--------|--------|
| COLNAU | DAMROY | ESOSIQ | EZAKIB | EZAKEX     | EZAKOH | EZAKUN | IDUQED | JAQCOT |
| JORDUS | JORFAA | JORFEE | JORHIK | KAZLUV     | KAZMAC | KAZMEG | KAZMIC | KAZMIK |
| KEDMUB | LUYSEG | LUYSIK | MOFHOF | MOFHUL     | MOFJAT | MOFJEX | MOFHOF | QEZVUQ |
| QOYRAZ | QOYRED | QOYRIH | ROQQET | SOBWA<br>H | TUKFAH | VIFKUT | VIFLAA | VIFLEE |
| VIFLII | WADHIS | WEJBES | ZHGKA  | ZOGPIV     | COGTUR |        |        |        |

## 2. Cartesian Coordinates:

### MOFJEZ optimized using periodic boundary conditions

|    |            |            |            |
|----|------------|------------|------------|
| Xe | 3.1254408  | 8.3969680  | 9.5713155  |
| C  | 3.3137974  | 7.2791577  | 7.7590488  |
| C  | 4.3925470  | 7.5656013  | 6.9267770  |
| C  | 2.3301293  | 6.3624523  | 7.4074166  |
| C  | 2.4609204  | 5.6709891  | 6.2017835  |
| C  | 3.5583288  | 5.9157807  | 5.3731266  |
| C  | 4.5161783  | 6.8726485  | 5.7198548  |
| F  | 1.2671001  | 6.1452378  | 8.1827248  |
| F  | 5.5485478  | 7.1084527  | 4.9012059  |
| F  | 1.5526510  | 4.7492729  | 5.8530607  |
| F  | 5.3000913  | 8.4854289  | 7.2662850  |
| F  | 3.7097853  | 5.2060916  | 4.2535066  |
| N  | 3.0205527  | 9.8929125  | 11.7839451 |
| C  | 3.1179797  | 10.2672741 | 12.8786812 |
| B  | 3.1696852  | 10.6679402 | 14.4199471 |
| C  | 1.6782430  | 10.5981286 | 14.9472084 |
| N  | 0.5689053  | 10.5525402 | 15.2916379 |
| C  | 4.0614754  | 9.5869630  | 15.1623933 |
| N  | 4.6958481  | 8.7558913  | 15.6746612 |
| C  | 3.7289224  | 12.1318720 | 14.6462355 |
| N  | 4.1032912  | 13.2124281 | 14.8587391 |
| F  | 6.2260428  | 6.0564871  | 8.6002595  |
| C  | 7.2891904  | 5.8392565  | 9.3755633  |
| C  | 7.4198914  | 6.5307537  | 10.5811902 |
| C  | 8.5173873  | 6.2859437  | 11.4098765 |
| C  | 8.2728109  | 4.9226527  | 9.0239681  |
| F  | 6.5116369  | 7.4524685  | 10.9299606 |
| F  | 8.6688003  | 6.9956617  | 12.5294700 |
| C  | 9.3515643  | 4.6361652  | 9.8562303  |
| C  | 9.4751801  | 5.3290826  | 11.0631099 |
| F  | 10.5075453 | 5.0932798  | 11.8817786 |
| F  | 10.2590528 | 3.7163104  | 9.5166978  |
| Xe | 8.0844193  | 3.8047210  | 7.2116627  |
| N  | 7.9795462  | 2.3088443  | 4.9991331  |
| C  | 8.0769963  | 1.9344726  | 3.9042656  |
| B  | 8.1287178  | 1.5338252  | 2.3630698  |
| C  | 6.6372383  | 1.6036315  | 1.8357753  |
| N  | 5.5279444  | 1.6492048  | 1.4913633  |
| C  | 9.0204575  | 2.6147479  | 1.6206212  |

|    |            |            |            |
|----|------------|------------|------------|
| N  | 9.6548798  | 3.4458582  | 1.1082836  |
| C  | 8.6879302  | 0.0698828  | 2.1367850  |
| N  | 9.0622543  | -1.0106319 | 1.9242797  |
| C  | -0.8342956 | 13.0571339 | 16.1505263 |
| C  | 0.1492322  | 13.9737223 | 15.7988973 |
| C  | 0.0186011  | 14.6652511 | 14.5933082 |
| C  | -1.0788717 | 14.4204471 | 13.7646299 |
| F  | 1.2124346  | 14.1909783 | 16.5741993 |
| F  | 0.9268727  | 15.5869509 | 14.2445331 |
| F  | -1.2302909 | 15.1301509 | 12.6450380 |
| C  | -1.9129882 | 12.7707446 | 15.3183053 |
| C  | -2.0366882 | 13.4635713 | 14.1113999 |
| F  | -3.0690403 | 13.2277921 | 13.2927239 |
| F  | -2.8205564 | 11.8508642 | 15.6577918 |
| Xe | -0.6459372 | 11.9392576 | 17.9627961 |
| N  | -0.5410413 | 10.4433032 | 20.1754989 |
| C  | -0.6384781 | 10.0689905 | 21.2701264 |
| B  | -0.6902395 | 9.6683533  | 22.8114478 |
| C  | 0.8012797  | 9.7381270  | 23.3387152 |
| N  | 1.9105433  | 9.7837060  | 23.6831235 |
| C  | -1.5819599 | 10.7492661 | 23.5539010 |
| N  | -2.2163321 | 11.5803061 | 24.0661993 |
| C  | -1.2494337 | 8.2043592  | 23.0377320 |
| N  | -1.6237602 | 7.1238833  | 23.2502006 |
| N  | 6.8695704  | 2.4180321  | 9.8829055  |
| C  | 5.7602973  | 2.4636409  | 10.2272723 |
| B  | 4.2687962  | 2.5334182  | 10.7545932 |
| C  | 3.7095920  | 3.9973807  | 10.5282501 |
| N  | 3.3352144  | 5.0779020  | 10.3158118 |
| C  | 4.3205224  | 2.1327522  | 12.2958225 |
| N  | 4.4179268  | 1.7584172  | 13.3904213 |
| C  | 3.3770214  | 1.4524538  | 10.0120711 |
| N  | 2.7426837  | 0.6214422  | 9.4998758  |
| Xe | 4.3130441  | 0.2624458  | 15.6032132 |
| C  | 4.1247333  | -0.8553115 | 17.4154338 |
| C  | 3.0459809  | -0.5689378 | 18.2477165 |
| C  | 5.1083574  | -1.7720152 | 17.7671151 |
| C  | 4.9775872  | -2.4635000 | 18.9727187 |
| C  | 3.8801614  | -2.2187091 | 19.8013560 |
| C  | 2.9223143  | -1.2618557 | 19.4546247 |
| F  | 6.1713754  | -1.9892472 | 16.9918268 |
| F  | 1.8899215  | -1.0260890 | 20.2732698 |
| F  | 5.8858670  | -3.3852303 | 19.3214468 |
| F  | 2.1384239  | 0.3508464  | 17.9082076 |
| F  | 3.7287043  | -2.9284112 | 20.9209539 |
| Xe | 3.1254323  | 3.8048063  | 1.1797937  |
| C  | 3.3138288  | 4.9225953  | -0.6324563 |
| C  | 4.3924985  | 4.6361973  | -1.4646922 |
| C  | 2.3301776  | 5.8392606  | -0.9840762 |
| C  | 2.4609367  | 6.5307471  | -2.1897125 |
| C  | 3.5583241  | 6.2859707  | -3.0183591 |
| C  | 4.5161866  | 5.3290735  | -2.6716124 |
| F  | 1.2670753  | 6.0565084  | -0.2087975 |
| F  | 5.5485416  | 5.0933078  | -3.4902823 |
| F  | 1.5526237  | 7.4525058  | -2.5384664 |
| F  | 5.3000373  | 3.7163611  | -1.1252150 |
| F  | 3.7098014  | 6.9956763  | -4.1379957 |
| N  | 3.0205713  | 2.3088203  | 3.3923764  |
| C  | 3.1180017  | 1.9344363  | 4.4872800  |
| B  | 3.1697119  | 1.5338531  | 6.0284455  |
| C  | 4.0614098  | 2.6147225  | 6.7708638  |

|    |            |            |            |
|----|------------|------------|------------|
| N  | 4.6958583  | 3.4458711  | 7.2832409  |
| C  | 1.6782034  | 1.6036333  | 6.5557343  |
| N  | 0.5690192  | 1.6492215  | 6.9001528  |
| C  | 3.7289275  | 0.0698812  | 6.2547305  |
| N  | 4.1032600  | -1.0106117 | 6.4672015  |
| F  | 6.2260581  | 6.1452466  | 0.2087630  |
| C  | 7.2892198  | 6.3624820  | 0.9840926  |
| C  | 7.4199209  | 5.6709915  | 2.1897040  |
| C  | 8.5173743  | 5.9158084  | 3.0183580  |
| C  | 8.2727853  | 7.2791106  | 0.6324661  |
| F  | 6.5116484  | 4.7492962  | 2.5384537  |
| F  | 8.6687969  | 5.2060950  | 4.1379878  |
| C  | 9.3515198  | 7.5655600  | 1.4647276  |
| C  | 9.4751632  | 6.8726333  | 2.6716328  |
| F  | 10.5075510 | 7.1084571  | 3.4902824  |
| F  | 10.2590959 | 8.4854717  | 1.1252023  |
| Xe | 8.0844288  | 8.3969914  | -1.1798203 |
| N  | 7.9795325  | 9.8928911  | -3.3923816 |
| C  | 8.0769930  | 10.2672961 | -4.4872412 |
| B  | 8.1287088  | 10.6679141 | -6.0284366 |
| C  | 6.6372036  | 10.5981308 | -6.5557259 |
| N  | 5.5279088  | 10.5525403 | -6.9001596 |
| C  | 9.0204599  | 9.5869798  | -6.7708748 |
| N  | 9.6548685  | 8.7558441  | -7.2831716 |
| C  | 8.6879426  | 12.1319246 | -6.2547241 |
| N  | 9.0622894  | 13.2124471 | -6.4671624 |
| N  | 6.8695215  | 9.7837298  | 1.4913593  |
| C  | 5.7602948  | 9.7381322  | 1.8357699  |
| B  | 4.2687887  | 9.6683583  | 2.3630476  |
| C  | 3.3770702  | 10.7492410 | 1.6206079  |
| N  | 2.7426500  | 11.5803780 | 1.1082734  |
| C  | 3.7095823  | 8.2044137  | 2.1367682  |
| N  | 3.3352042  | 7.1238135  | 1.9242710  |
| C  | 4.3205064  | 10.0689378 | 3.9042280  |
| N  | 4.4179567  | 10.4433300 | 4.9991204  |
| Xe | 4.3130588  | 11.9392878 | 7.2116944  |
| C  | 4.1246598  | 13.0571195 | 9.0239792  |
| C  | 3.0459789  | 12.7706895 | 9.8562044  |
| C  | 5.1083189  | 13.9737743 | 9.3755893  |
| C  | 4.9775714  | 14.6652581 | 10.5812331 |
| C  | 3.8801569  | 14.4204645 | 11.4098899 |
| C  | 2.9222977  | 13.4635679 | 11.0631259 |
| F  | 6.1714087  | 14.1910032 | 8.6002902  |
| F  | 1.8899831  | 13.2278008 | 11.8817907 |
| F  | 5.8858686  | 15.5869679 | 10.9299695 |
| F  | 2.1384533  | 11.8508637 | 9.5167260  |
| F  | 3.7287171  | 15.1301448 | 12.5294918 |
| C  | 8.0049442  | 15.7000709 | 6.9267515  |
| C  | 7.8813214  | 15.0071224 | 5.7198523  |
| F  | 6.8489272  | 15.2429319 | 4.9012154  |
| F  | 7.0973907  | 16.6199843 | 7.2663115  |
| C  | 9.0837042  | 15.4135573 | 7.7590224  |
| C  | 8.8391153  | 14.0503028 | 5.3730821  |
| C  | 9.9366292  | 13.8054845 | 6.2017692  |
| C  | 10.0673054 | 14.4969594 | 7.4073965  |
| F  | 11.1304570 | 14.2797434 | 8.1827344  |
| F  | 10.8448475 | 12.8838268 | 5.8530070  |
| F  | 8.6877096  | 13.3406156 | 4.2535058  |
| Xe | 9.2720698  | 16.5315092 | 9.5713481  |
| N  | 9.3769654  | 18.0274007 | 11.7839921 |
| C  | 9.2795095  | 18.4017766 | 12.8787316 |

|   |            |            |            |
|---|------------|------------|------------|
| B | 9.2278017  | 18.8024208 | 14.4199560 |
| C | 8.3360281  | 17.7214705 | 15.1624207 |
| N | 7.7016557  | 16.8903656 | 15.6746116 |
| C | 10.7192739 | 18.7326388 | 14.9472503 |
| N | 11.8285730 | 18.6870245 | 15.2916546 |
| C | 8.6685801  | 20.2663767 | 14.6462494 |
| N | 8.2941984  | 21.3469650 | 14.8586895 |

#### Dimer A in water

|   |            |            |            |
|---|------------|------------|------------|
| B | 0.0061270  | -0.0540446 | 2.3888191  |
| N | -2.3823335 | -1.4032046 | 2.1760805  |
| N | 1.7730641  | -0.9112141 | 0.4629190  |
| C | 0.6301851  | -0.3880890 | 3.8162158  |
| C | -1.3784271 | -0.8208941 | 2.2474261  |
| N | 1.0870693  | -0.6335099 | 4.8574631  |
| C | 1.0162012  | -0.5427484 | 1.2651563  |
| C | -0.2055890 | 1.5167262  | 2.2781413  |
| N | -0.3334367 | 2.6710412  | 2.2222497  |
| B | -0.0061270 | 0.0540446  | -2.3888191 |
| N | 2.3823335  | 1.4032046  | -2.1760805 |
| N | -1.7730641 | 0.9112141  | -0.4629190 |
| C | -0.6301851 | 0.3880890  | -3.8162158 |
| C | 1.3784271  | 0.8208941  | -2.2474261 |
| N | -1.0870693 | 0.6335099  | -4.8574631 |
| C | -1.0162012 | 0.5427484  | -1.2651563 |
| C | 0.2055890  | -1.5167262 | -2.2781413 |
| N | 0.3334367  | -2.6710412 | -2.2222497 |

#### Dimer B in water

|   |            |            |            |
|---|------------|------------|------------|
| B | -0.0000000 | -0.0000000 | 3.0332789  |
| N | -0.0004318 | 2.6234293  | 2.2024763  |
| N | -2.2717405 | -1.3120886 | 2.2024763  |
| C | -0.0000000 | -0.0000000 | 4.6271159  |
| C | 0.0016809  | 1.5074718  | 2.5294093  |
| N | -0.0000000 | -0.0000000 | 5.7903854  |
| C | -1.3063493 | -0.7522803 | 2.5294093  |
| C | 1.3046685  | -0.7551916 | 2.5294093  |
| N | 2.2721723  | -1.3113407 | 2.2024763  |
| B | -0.0000000 | 0.0000000  | -3.0718267 |
| N | -0.2794155 | 2.5813965  | -3.9874907 |
| N | -0.0000000 | 0.0000000  | -0.3212688 |
| C | -1.2106591 | -0.8840720 | -3.6022549 |
| C | -0.1602992 | 1.4904976  | -3.6022549 |
| N | -2.0958472 | -1.5326792 | -3.9874907 |
| C | -0.0000000 | 0.0000000  | -1.4841045 |
| C | 1.3709584  | -0.6064256 | -3.6022549 |
| N | 2.3752627  | -1.0487173 | -3.9874907 |

#### Dimer C in water

|    |            |            |             |
|----|------------|------------|-------------|
| Xe | 0.2216402  | -0.3383508 | -7.5361904  |
| F  | -2.3244221 | -0.5613375 | -9.4482068  |
| F  | -0.4595641 | 0.5174601  | -13.6531429 |
| C  | -1.2700948 | -0.2174194 | -10.1920159 |
| F  | -2.6154268 | -0.1847153 | -12.1388006 |
| F  | 2.2958442  | 0.4776255  | -9.8151090  |
| C  | -0.0127786 | -0.0448432 | -9.6225898  |
| C  | -0.3142181 | 0.3351279  | -12.3406093 |
| C  | -1.4197672 | -0.0251720 | -11.5659132 |
| C  | 1.0968046  | 0.3147633  | -10.3803682 |
| F  | 1.9911965  | 0.8509786  | -12.5044687 |

|   |            |            |             |
|---|------------|------------|-------------|
| C | 0.9421885  | 0.5059668  | -11.7537656 |
| B | 0.5970881  | -0.8027694 | -2.2181256  |
| N | -0.4036732 | -3.2274095 | -1.3917110  |
| N | -0.9168891 | 1.2458483  | -1.1802813  |
| C | 0.5373412  | -0.7300850 | -3.8082790  |
| C | 0.0172908  | -2.2022300 | -1.7429682  |
| N | 0.4926884  | -0.6755819 | -4.9653194  |
| C | -0.2764240 | 0.3805224  | -1.6192657  |
| C | 2.1075408  | -0.6578894 | -1.7510376  |
| N | 3.2130593  | -0.5562813 | -1.4058973  |

### Dimer ion-pair in water

|    |            |            |             |
|----|------------|------------|-------------|
| Xe | 0.2207062  | -0.3326028 | -7.5174991  |
| F  | -2.3226487 | -0.5626220 | -9.4304961  |
| F  | -0.4590226 | 0.5134876  | -13.6363688 |
| C  | -1.2684872 | -0.2187123 | -10.1748929 |
| F  | -2.6144376 | -0.1899166 | -12.1213859 |
| F  | 2.2968750  | 0.4788176  | -9.7985937  |
| C  | -0.0115282 | -0.0443009 | -9.6053144  |
| C  | -0.3131967 | 0.3321326  | -12.3237126 |
| C  | -1.4187413 | -0.0281656 | -11.5488533 |
| C  | 1.0977250  | 0.3152212  | -10.3636297 |
| F  | 1.9922332  | 0.8484636  | -12.4887871 |
| C  | 0.9433166  | 0.5045113  | -11.7372984 |
| B  | 0.6035866  | -0.8111009 | -2.2068155  |
| N  | -0.4395542 | -3.2413129 | -1.4587491  |
| N  | -0.9273679 | 1.2630352  | -1.2545667  |
| C  | 0.5422016  | -0.7340711 | -3.7992247  |
| C  | 0.0100249  | -2.2111176 | -1.7549047  |
| N  | 0.4901100  | -0.6704743 | -4.9556097  |
| C  | -0.2745606 | 0.3795578  | -1.6351556  |
| C  | 2.1174574  | -0.6561600 | -1.7586319  |
| N  | 3.2347331  | -0.5304618 | -1.4635752  |
| Xe | -0.2204546 | 0.3331934  | 7.5174284   |
| F  | 2.3232807  | 0.5605515  | 9.4303493   |
| F  | 0.4588634  | -0.5136717 | 13.6362476  |
| C  | 1.2688540  | 0.2175009  | 10.1747586  |
| F  | 2.6149640  | 0.1876758  | 12.1211911  |
| F  | -2.2973927 | -0.4762531 | 9.7989091   |
| C  | 0.0115495  | 0.0446883  | 9.6054097   |
| C  | 0.3131664  | -0.3323633 | 12.3235966  |
| C  | 1.4190292  | 0.0271116  | 11.5487548  |
| C  | -1.0980738 | -0.3135526 | 10.3638360  |
| F  | -1.9928585 | -0.8464399 | 12.4890160  |
| C  | -0.9437384 | -0.5030538 | 11.7374821  |
| B  | -0.6035585 | 0.8110149  | 2.2067449   |
| N  | 0.9257158  | -1.2645540 | 1.2550318   |
| N  | 0.4408878  | 3.2402398  | 1.4573371   |
| C  | -0.5417747 | 0.7344559  | 3.7991724   |
| C  | 0.2737196  | -0.3803911 | 1.6354447   |
| N  | -0.4895284 | 0.6711985  | 4.9555583   |
| C  | -0.0093286 | 2.2104820  | 1.7540566   |
| C  | -2.1176471 | 0.6566976  | 1.7591068   |
| N  | -3.2350997 | 0.5312611  | 1.4646333   |

### Dimer ion-pair gas phase

|    |            |            |             |
|----|------------|------------|-------------|
| Xe | 0.1817926  | -0.2615284 | -7.3229959  |
| F  | -2.3305894 | -0.5474786 | -9.3089450  |
| F  | -0.4155027 | 0.4332915  | -13.5153677 |

|    |            |            |             |
|----|------------|------------|-------------|
| C  | -1.2646785 | -0.2144825 | -10.0470282 |
| F  | -2.5893584 | -0.2388411 | -12.0115641 |
| F  | 2.2870858  | 0.5054899  | -9.6391596  |
| C  | -0.0203339 | -0.0222162 | -9.4550893  |
| C  | -0.2873914 | 0.2866403  | -12.1985269 |
| C  | -1.4036566 | -0.0596428 | -11.4283726 |
| C  | 1.0925514  | 0.3227835  | -10.2156318 |
| F  | 2.0175499  | 0.8119643  | -12.3416908 |
| C  | 0.9620550  | 0.4798649  | -11.5977397 |
| B  | 0.6165823  | -0.8401308 | -2.1891100  |
| N  | -0.4240677 | -3.3376992 | -1.7394379  |
| N  | -0.8979753 | 1.2121519  | -1.1782959  |
| C  | 0.4918047  | -0.6625486 | -3.7828240  |
| C  | 0.0269660  | -2.2746229 | -1.8773865  |
| N  | 0.4030477  | -0.5331118 | -4.9343830  |
| C  | -0.2466684 | 0.3315721  | -1.5694247  |
| C  | 2.1610825  | -0.7106235 | -1.8722832  |
| N  | 3.3106811  | -0.6011029 | -1.7345545  |
| Xe | -0.1817926 | 0.2615284  | 7.3229959   |
| F  | 2.3305894  | 0.5474786  | 9.3089450   |
| F  | 0.4155027  | -0.4332915 | 13.5153677  |
| C  | 1.2646785  | 0.2144825  | 10.0470282  |
| F  | 2.5893584  | 0.2388411  | 12.0115641  |
| F  | -2.2870858 | -0.5054899 | 9.6391596   |
| C  | 0.0203339  | 0.0222162  | 9.4550893   |
| C  | 0.2873914  | -0.2866403 | 12.1985269  |
| C  | 1.4036566  | 0.0596428  | 11.4283726  |
| C  | -1.0925514 | -0.3227835 | 10.2156318  |
| F  | -2.0175499 | -0.8119643 | 12.3416908  |
| C  | -0.9620550 | -0.4798649 | 11.5977397  |
| B  | -0.6165823 | 0.8401308  | 2.1891100   |
| N  | 0.8979753  | -1.2121519 | 1.1782959   |
| N  | 0.4240677  | 3.3376992  | 1.7394379   |
| C  | -0.4918047 | 0.6625486  | 3.7828240   |
| C  | 0.2466684  | -0.3315721 | 1.5694247   |
| N  | -0.4030477 | 0.5331118  | 4.9343830   |
| C  | -0.0269660 | 2.2746229  | 1.8773865   |
| C  | -2.1610825 | 0.7106235  | 1.8722832   |
| N  | -3.3106811 | 0.6011029  | 1.7345545   |

#### Dimer ion-pair-K in water

|   |            |            |            |
|---|------------|------------|------------|
| B | 0.6025165  | -0.8135613 | -2.2143393 |
| N | -0.4315936 | -3.2432220 | -1.4456258 |
| N | -0.9341705 | 1.2644602  | -1.2762832 |
| C | 0.5475108  | -0.7417999 | -3.8052663 |
| C | 0.0116176  | -2.2119783 | -1.7487663 |
| N | 0.4957759  | -0.6745687 | -4.9638016 |
| C | -0.2781436 | 0.3780453  | -1.6449635 |
| C | 2.1136908  | -0.6589635 | -1.7516652 |
| N | 3.2302692  | -0.5385148 | -1.4510364 |
| B | -0.6024477 | 0.8134157  | 2.2142431  |
| N | 0.9320881  | -1.2664218 | 1.2768608  |
| N | 0.4330071  | 3.2418660  | 1.4438338  |
| C | -0.5470004 | 0.7423553  | 3.8051676  |
| C | 0.2770182  | -0.3791616 | 1.6451872  |
| N | -0.4950375 | 0.6754822  | 4.9637147  |
| C | -0.0107616 | 2.2111347  | 1.7477030  |
| C | -2.1139431 | 0.6596635  | 1.7523356  |
| N | -3.2308127 | 0.5398233  | 1.4524403  |
| K | 0.2142473  | -0.3198429 | -7.7175253 |
| K | -0.2135622 | 0.3206782  | 7.7175690  |
